# Supplementary material
Source: publisher figshare collection journal article supplement (https://gsapubs.figshare.com/ndownloader/files/37379209)
Supplement: Supplementary file 1 [file 37379209]

## Sheet: Table DR5
Locality	Rock type	Age	Dating method	References
South Kunlun Belt
Helegangnaren	Granite	425 ± 7	LA-ICPMS zircon U-Pb	Li et al., 2013a
Yikehalaer	Granodiorite	436 ±	LA-ICPMS zircon U-Pb	Li et al., 2014a
Yikehalaer	Granodiorite	436 ± 7	LA-ICPMS zircon U-Pb	Li et al., 2015b
Yikehalaer	Granodiorite	437 ± 6	LA-ICPMS zircon U-Pb	Li et al., 2015b
Bairiqiete	Rhyolite porphyry	438	LA-ICPMS zircon U-Pb	Liu et al., 2011
Bairiqiete	Granodiorite	441	LA-ICPMS zircon U-Pb	Liu et al., 2011
Bairiqiete	Granodiorite	439 ± 2	LA-ICPMS zircon U-Pb	LI et al., 2014c
Wanbaogou	Biotite monzogranite	441	SHRIMP zircon U-Pb	Wang et al., 2012
Huatugou	Granite	451 ± 3	LA-ICPMS zircon U-Pb	Liu et al., 2014
Huatugou	Granite	461 ± 4	LA-ICPMS zircon U-Pb	Liu et al., 2014
Huatugou	Granite	450 ± 2	LA-ICPMS zircon U-Pb	Liu et al., 2014
South of Xiadawu	Hornblende diorite	447 ± 1	LA-ICPMS zircon U-Pb	Xiong et al., 2015
South of Xiadawu	Hornblende diorite	451 ± 2	LA-ICPMS zircon U-Pb	Xiong et al., 2015
South of Xiadawu	Granodiorite	447 ± 3	LA-ICPMS zircon U-Pb	Xiong et al., 2015
Manite	Granodiorite	479 ± 2	LA-ICPMS zircon U-Pb	Li et al., 2017
Manite	Granodiorite	487 ± 11	LA-ICPMS zircon U-Pb	Li et al., 2017
De’erni	Diorite	493 ± 6	SHRIMP zircon U-Pb	Li, 2008
Buqingshan	Tonalite	402 ± 24	TIMS zircon U-Pb	Bian et al., 2007
Aowade	Granodiorite	454 ± 2	LA-ICPMS zircon U-Pb	Chen et al., 2016
South to Dagangou	Rhyolite	400 ± 3	LA-ICPMS zircon U-Pb	Lu et al., 2010
South to Dagangou	Rhyolite	423 ± 2	LA-ICPMS zircon U-Pb	Lu et al., 2010
Shuinichang	Rhyolite	408 ± 2	LA-ICPMS zircon U-Pb	Lu et al., 2010
Shuinichang	Rhyolite	405 ± 5	LA-ICPMS zircon U-Pb	Lu et al., 2010
Maerzheng	Granodiorite	498 ± 2	LA-ICPMS zircon U-Pb	Qi, 2015
Maerzheng	Tonalite	486 ± 1	LA-ICPMS zircon U-Pb	Qi, 2015
South to Heihai	Tonalite	471 ± 2	LA-ICPMS zircon U-Pb	Qi, 2015
East to Yuejinshan	Hornblende gabbros	393 ± 4	LA-ICPMS zircon U-Pb	Xiong et al., 2014
East to Yuejinshan	Hornblende gabbros	393 ± 3	LA-ICPMS zircon U-Pb	Xiong et al., 2014
Central Kunlun Belt
Xiarihamu	K-feldspar granite	391 ± 1	LA-ICPMS zircon U-Pb	Wang et al., 2013b
Xiarihamu	Gabbro	394 ± 3	LA-ICPMS zircon U-Pb	Li et al., 2012b
Xiarihamu	Gabbro	423 ± 1	LA-ICPMS zircon U-Pb	Wang et al., 2014a
Xiarihamu	Gabbro	424 ± 1	LA-ICPMS zircon U-Pb	Peng et al., 2016a
Xiarihamu	Gabbro	439 ± 3	ZirconU–Pb	Jiang et al., 2015
Xiarihamu	Peridotite	439	LA-ICPMS zircon U-Pb	Jiang et al., 2015
Xiarihamu	Peridotite	412 ± 2	LA-ICPMS zircon U-Pb	Zhang et al., 2015
Xiarihamu	Ultramafic rock	411 ± 2	ZirconU–Pb	Li et al., 2015a
Xiarihamu	Gabbro	431 ± 2	ZirconU–Pb	Li et al., 2015a
Xiarihamu	Gabbronorite	406 ± 3	ZirconU–Pb	Song et al., 2016
Xiarihamu	Gabbro	408 ± 3	ZirconU–Pb	Song et al., 2016
Xiarihamu	Websterite	408 ± 3	SHRIMP zircon U-Pb	Song et al., 2016
Xiarihamu	Websterite	406 ± 3	SHRIMP zircon U-Pb	Song et al., 2016
Xiarihamu	Gabbronorite	406 ± 3	SHRIMP zircon U-Pb	Song et al., 2016
Hongqigou	Monzogranite	420 ± 2	LA-ICPMS zircon U-Pb	Lu et al., 2013
Shenshuitan	Monzogranite	419 ± 2	LA-ICPMS zircon U-Pb	Lu et al., 2013
Wulonggou	Granite	425 ± 2	LA-ICPMS zircon U-Pb	Xin et al., 2018
Wulonggou	Granite	426 ± 3	LA-ICPMS zircon U-Pb	Xin et al., 2018
Wulonggou	Granite	424 ± 2	LA-ICPMS zircon U-Pb	Xin et al., 2018
Wulonggou	Granite	424 ± 2	LA-ICPMS zircon U-Pb	Xin et al., 2018
Dagangou	K-feldspar granite	392 ± 2	LA-ICPMS zircon U-Pb	Tian et al., 2016
Hongqigou	Biotite K-feldspar granite	396 ± 5	SHRIMP zircon U-Pb	Zhang, 2015
Shuizhadonggou	Medium-grain K-feldspar granite	396 ± 6	SHRIMP zircon U-Pb	Zhang, 2015
Shuizhadonggou	Monzogranite	405 ± 5	LA-ICPMS zircon U-Pb	Wang, 2015
Shuizhadonggou	Granite	409 ± 3	LA-ICPMS zircon U-Pb	Wang, 2015
Dachagou	K-feldspar granite	416 ± 3	LA-ICPMS zircon U-Pb	Wang, 2015
Huanglonggou	K-feldspar granite	417 ± 1	LA-ICPMS zircon U-Pb	Li et al., 2014b
Danshuigou	Monzogranite	405 ± 4	LA-ICPMS zircon U-Pb	Lu, 2011
Danshuigou	Monzogranite	411 ± 2	LA-ICPMS zircon U-Pb	Lu, 2011
Hongqigou	Monzogranite	420 ± 2	LA-ICPMS zircon U-Pb	Lu, 2011
Shenshuitan	Monzogranite	420 ± 2	LA-ICPMS zircon U-Pb	Lu, 2011
Huanglonggou	Monzogranite	420 ± 2	LA-ICPMS zircon U-Pb	Lu, 2011
Huanglonggou	Monzogranite	418 ± 2	LA-ICPMS zircon U-Pb	Lu, 2011
Houtougou	Monzogranite	419 ± 2	LA-ICPMS zircon U-Pb	Yan, 2016
Huanglonggou	Monzogranite	438 ± 3	LA-ICPMS zircon U-Pb	Wang et al., 2016
South of Golmud	Rhyolite	450 ± 4	SHRIMP zircon U-Pb	Zhang et al., 2010a
South of Golmud	Volcanic rocks	474 ± 8	LA-ICPMS zircon U-Pb	Chen et al., 2013b
Juchishan	Dacite	406 ± 3	SHRIMP zircon U-Pb	Zhang et al., 2010b
Juchishan	Rhyolite	409 ± 3	SHRIMP zircon U-Pb	Peng et al., 2016b
Juchishan	Tuff	404 ± 5	SHRIMP zircon U-Pb	Peng et al., 2016b
Yuejinshan	Gabbro	406 ± 3	LA-ICPMS zircon U-Pb	Liu, 2011
Yuejinshan	Granodiorite	407 ± 3	LA-ICPMS zircon U-Pb	Liu, 2011
Binggou	K-feldspar granite	391 ± 3	LA-ICPMS zircon U-Pb	Liu et al., 2013a
Yuejinshan	Hornblende gabbro	393 ± 2	LA-ICPMS zircon U-Pb	Xiong et al., 2014
Jinshuikou	Granodiorite	391	LA-ICPMS zircon U-Pb	Long, 2004
Tiantaishan	Bitotite granite	403	SHRIMP zircon U-Pb	Long, 2004
Jinshuikou	Gabbro	405	SHRIMP zircon U-Pb	Long, 2004
Jinshuikou	Biotite monzogranite	396	SHRIMP zircon U-Pb	Long, 2004
Jinshuikou	Garnet- cordierite Granite	411 ± 17	LA-ICPMS zircon U-Pb	Long et al., 2006
Jinshuikou	Biotite granodiorite	396 ± 18	SHRIMP zircon U-Pb	Long et al., 2006
Jinshuikou	Granite	402	SHRIMP zircon U-Pb	Yu et al., 2005
Huxiaoqin	Hornblende dolerite	438	LA-ICPMS zircon U-Pb	Liu et al., 2013b
Shitoukengde	Olivine gabbro	422 ± 2	Zircon U–Pb	Li et al., 2018
Shitoukengde	Gabbro	426 ± 6	Zircon U–Pb	Li et al., 2018
Shitoukengde	Gabbro	425 ± 4	Zircon U–Pb	Zhang et al., 2018
Xiugou	Tholeiite	419	SHRIMP zircon U-Pb	Zhu et al., 2006
Xiugou	Tuff	414 ± 2	LA-ICPMS zircon U-Pb	Ni, 2010
Xiugou	Basalt	421 ± 2	LA-ICPMS zircon U-Pb	Ni, 2010
Santougou	Diorite	427 ± 3	LA-ICPMS zircon U-Pb	Zhang et al., 2014
Santougou	Granodiorite	432 ± 2	LA-ICPMS zircon U-Pb	Zhang et al., 2014
Santougou	Granodiorite	432 ± 2	LA-ICPMS zircon U-Pb	Zhang et al., 2014
Nuomuhong	Pillow basalt	419 ± 5	SHRIMP zircon U-Pb	Wang et al., 2007
North to Qiangshuiquan	Gabbro	452 ± 5	LA-ICPMS zircon U-Pb	Wei, 2015
Qushiang	Gabbro	456 ± 1	LA-ICPMS zircon U-Pb	Wei, 2015
Qingshuiquan	Hornblende gabbro	452 ± 2	LA-ICPMS zircon U-Pb	Sang et al., 2016
Qingshuiquan	Dolerite	436	LA-ICPMS zircon U-Pb	Ren et al., 2009
Guoluolongwa	Dolerite	416 ± 4	LA-ICPMS zircon U-Pb	Yue et al., 2013
Sederi	Dolerite	417 ± 1	LA-ICPMS zircon U-Pb	Yue et al., 2017
Zhiyu	Quartz diorite	408 ± 2	LA-ICPMS zircon U-Pb	Zhou et al., 2016
Zhiyu	Monzogranite	447 ± 2	LA-ICPMS zircon U-Pb	Zhou et al., 2016
Zhiyu	Biotite granite	448 ± 3	LA-ICPMS zircon U-Pb	Zhou et al., 2016
Jiawongmen	Diorite	447 ± 9	LA-ICPMS zircon U-Pb	Chen et al., 2001
Annage	Diorite	474 ± 2	LA-ICPMS zircon U-Pb	Kong et al., 2014
Wutuo	K-feldspar granite	400	LA-ICPMS zircon U-Pb	Our unpublished data
Walega	Diorite	440	LA-ICPMS zircon U-Pb	Our unpublished data
Guoluolongwa	Diorite	477	LA-ICPMS zircon U-Pb	Our unpublished data
Kengdenongshe	Granite porphyry	447	LA-ICPMS zircon U-Pb	Our unpublished data
South to Guoluolongwa	Diorite	471	LA-ICPMS zircon U-Pb	Our unpublished data
Walega	Quartz diorite	431	LA-ICPMS zircon U-Pb	Our unpublished data
Hariza	Tonalite	422 ± 2	LA-ICPMS zircon U-Pb	Zhang et al., 2016a
Qimantagh Belt
Kayakedengtage	K-feldspar granite	357 ± 3	LA-ICPMS zircon U-Pb	Wang et al., 2013a
Kayakedengtage	K-feldspar granite	370 ± 3	LA-ICPMS zircon U-Pb	Wang et al., 2013a
Kayakedengtage	Diorite	363 ± 3	LA-ICPMS zircon U-Pb	Wang et al., 2013a
Tula	Granite	385 ± 8	SHRIMP zircon U-Pb	Wu et al., 2007
Kayakedengtage	Dolerite	380 ± 2	LA-ICPMS zircon U-Pb	Bao et al., 2013
Yemaquan	Granodiorite	386 ± 1	LA-ICPMS zircon U-Pb	Gao et al., 2014
Yemaquan	Monzogranite	393 ± 2	LA-ICPMS zircon U-Pb	Gao et al., 2014
Wulanwuzhuer	K-feldspar granite	389 ± 4	LA-ICPMS zircon U-Pb	Guo et al., 2011
Weibao	Basaltic lavas	392 ± 5	SHRIMP zircon U-Pb	Zhong et al., 2017
Weibao	Basaltic lavas	393 ± 6	SHRIMP zircon U-Pb	Zhong et al., 2017
Lalingzaohuo	Monzogranite	396 ± 2	LA-ICPMS zircon U-Pb	Chen et al., 2013a
Kayakedengtage	Monzogranite	394 ± 13	SHRIMP zircon U-Pb	Chen et al., 2006
Kayakedengtage	Gabbro	403 ± 7	SHRIMP zircon U-Pb	Chen et al., 2006
Heishan	Gabbro	405 ± 1	zirconU-Pb	Chen et al., 2004
Niukutougou	Granodiorite	394 ± 1	LA-ICPMS zircon U-Pb	Yao et al., 2016
Kaerqueka	Monzogranite	406 ± 4	LA-ICPMS zircon U-Pb	Yao et al., 2016
Wulanwuzhuer	Monzogranite	413 ± 5	LA-ICPMS zircon U-Pb	Tan et al., 2011
Baiganhu	K-feldspar granite	422 ± 3	SIMS zircon U-Pb	Li et al., 2012a
Baiganhu	Monzogranite	421 ± 4	SIMS zircon U-Pb	Li et al., 2012a
Heihai	Two-mica granite	422	LA-ICPMS zircon U-Pb	Shi et al., 2016
Heihai	Granite	421	LA-ICPMS zircon U-Pb	Shi et al., 2016
Baiganhu	K-feldspar granite	423 ± 2	LA-ICPMS zircon U-Pb	Wang et al., 2014b
Baiganhu	Monzogranite	428 ± 4	LA-ICPMS zircon U-Pb	Wang et al., 2014b
Wulanwuzhu	K-feldspar granite	421 ± 2	LA-ICPMS zircon U-Pb	Hao et al., 2014b
Nalinggelehe	Biotite monzogranite	421 ± 3	LA-ICPMS zircon U-Pb	Hao et al., 2014b
Baiganhu	Monzogranite	431 ± 1	LA-ICPMS zircon U-Pb	Gao, 2013
Kekekaerde	Monzogranite	430 ± 3	LA-ICPMS zircon U-Pb	Gao, 2013
Xiaolangyashan	Rhyolite	450	LA-ICPMS zircon U-Pb	Wang, 2012
Xiaolangyashan	Basalt	440	LA-ICPMS zircon U-Pb	Wang, 2012
Kayakedengtage	Granodiorite	381 ± 1	LA-ICPMS zircon U-Pb	Hao et al., 2014a
Naitoushan	Diorite	446 ± 2	LA-ICPMS zircon U-Pb	Li et al., 2013b
Northern Wotoushan	Granite	439 ± 6	LA-ICPMS zircon U-Pb	Li et al., 2013b
Northern Wotoushan	Diorite	424 ± 4	LA-ICPMS zircon U-Pb	Li et al., 2013b
Eastern Shuangshixia	Granite	462 ± 4	LA-ICPMS zircon U-Pb	Li et al., 2013b
Eastern Shuangshixia	Granite	429 ± 4	LA-ICPMS zircon U-Pb	Li et al., 2013b
Yemaquan	Granodiorite	392 ± 2	LA-ICPMS zircon U-Pb	Song et al., 2014
Gashundawu	Biotite monzogranite	393 ± 2	LA-ICPMS zircon U-Pb	Zhang et al., 2016b
South of Binggou	Pyroxenite	378 ± 3	Zircon U–Pb	Zhang et al., 2017
References Bao, G.P., Wang, G.L., Liu, R., and Han, H.C., 2013, Kayakedengtage area two basic dike rocks geochemistry and significance [in Chinese with English abstract]: Northwestern Geology, v. 46, no. 2, p. 37–43. Bian, Q.T., Pospelov, I.I., Li, H.M., Chang, C.F., and Li, J.L, 2007, Discovery of the end-Early Paleozoic adakite in the Buqingshan area, Qinghai province, and its tectonic implicat…
